# Supplementary figures and images for: Estimation of Laceration Length by Emergency Department Personnel
Source: PubMed Central journal article supplement — West J Emerg Med. 2014 Oct 28;15(7):889–91. doi: 10.5811/westjem.2014.9.22691 (PMC4251246; doi:10.5811/westjem.2014.9.22691), 2014-10-28

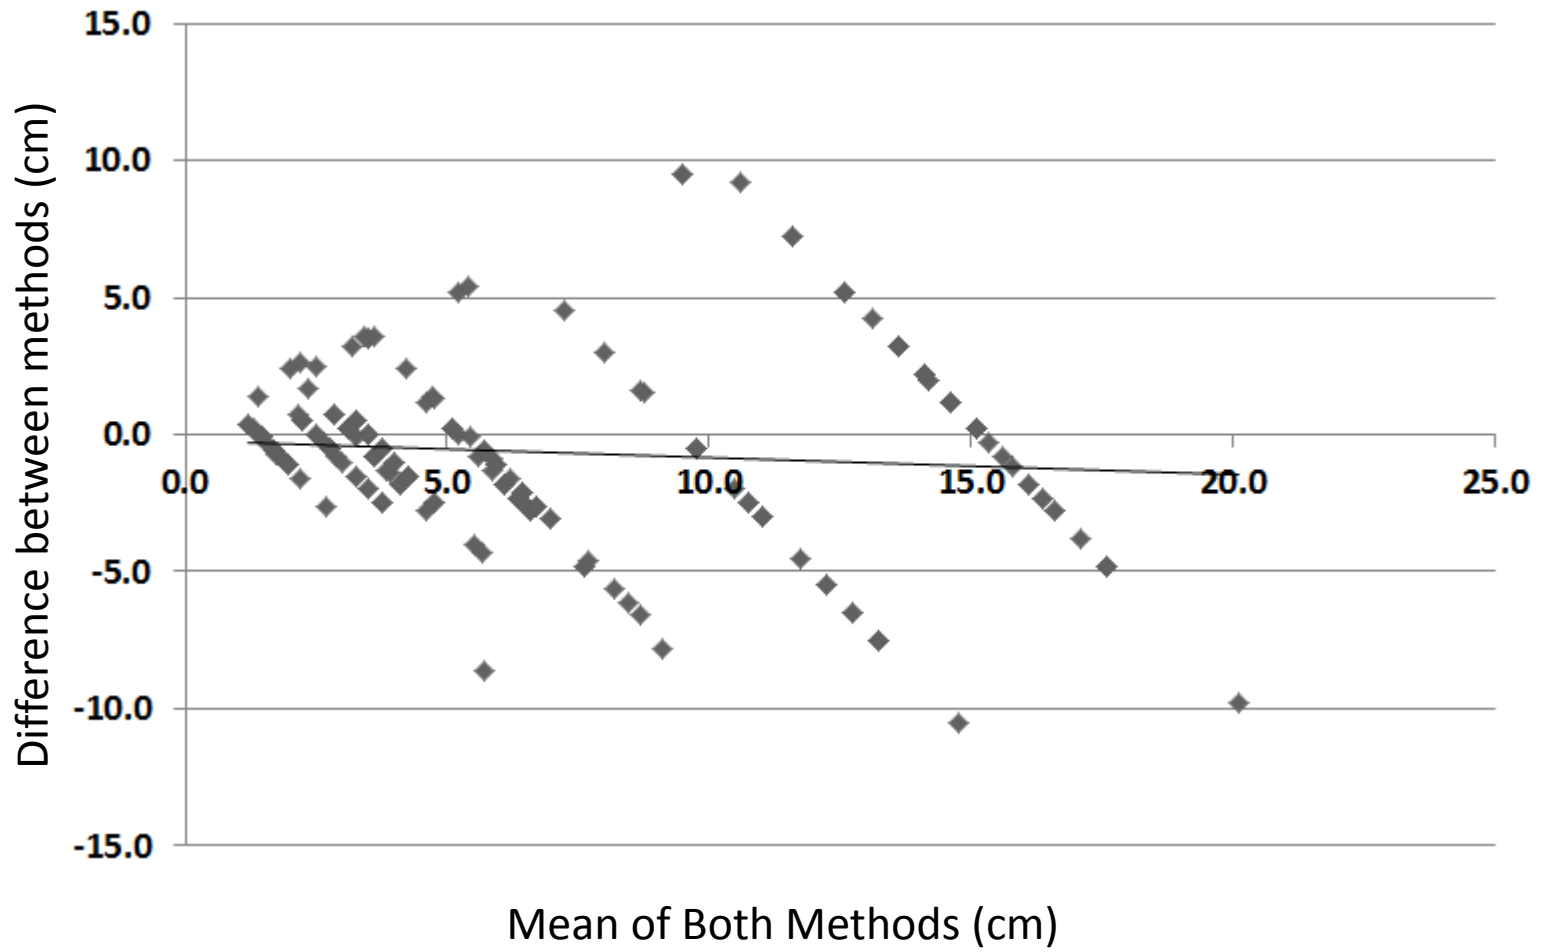

Supplement: wjem-15-889-g001.pdf [file wjem-15-889-g001.pdf]

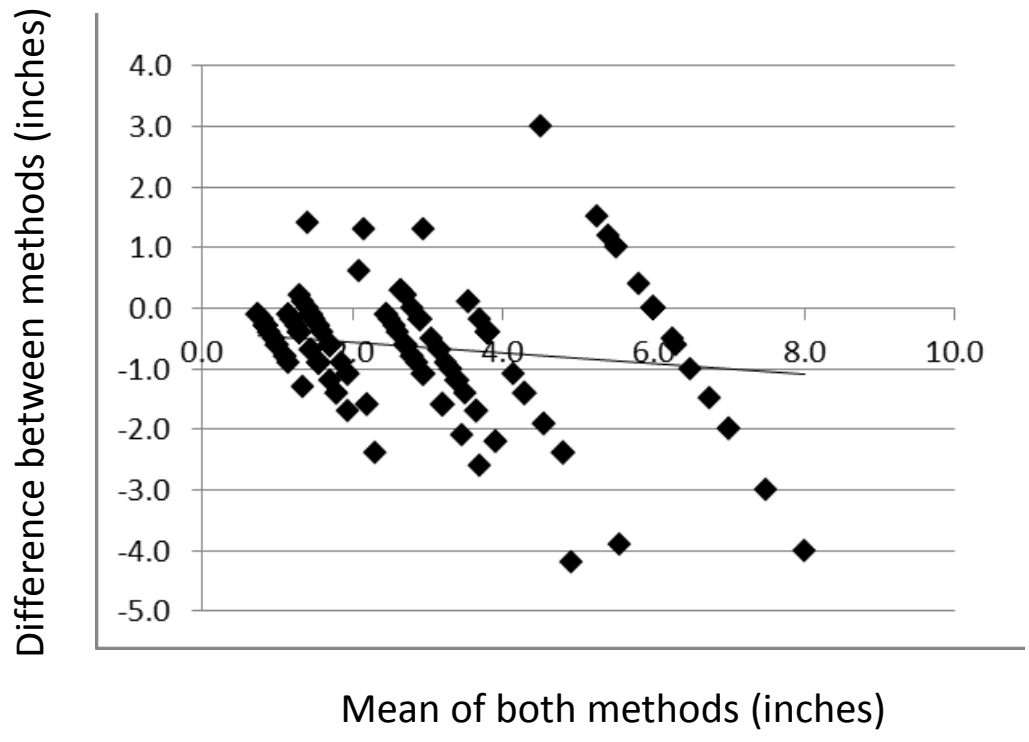

Supplement: wjem-15-889-g002.pdf [file wjem-15-889-g002.pdf]
